# Supplementary material for: Bio-Based Polyurethane Foams for the Removal of Petroleum-Derived Pollutants: Sorption in Batch and in Continuous-Flow
Source: MDPI journal article supplement (doi:10.3390/polym15071785), 2023-04-03
Supplement: s1 [file s1]

## FREUNDLICH MODEL PLOTS

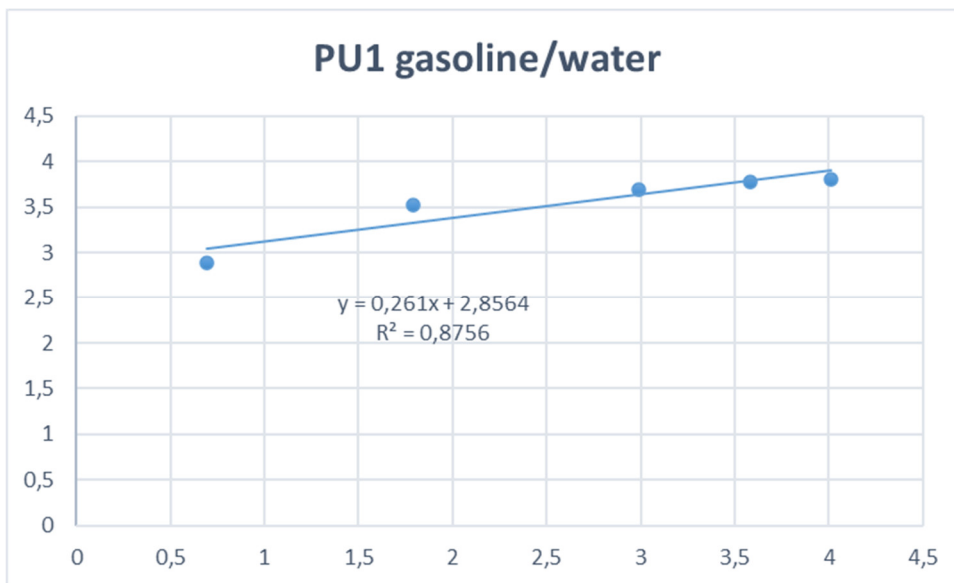

**Figure S1.** Freundlich plot for PU1 in gasoline/water.

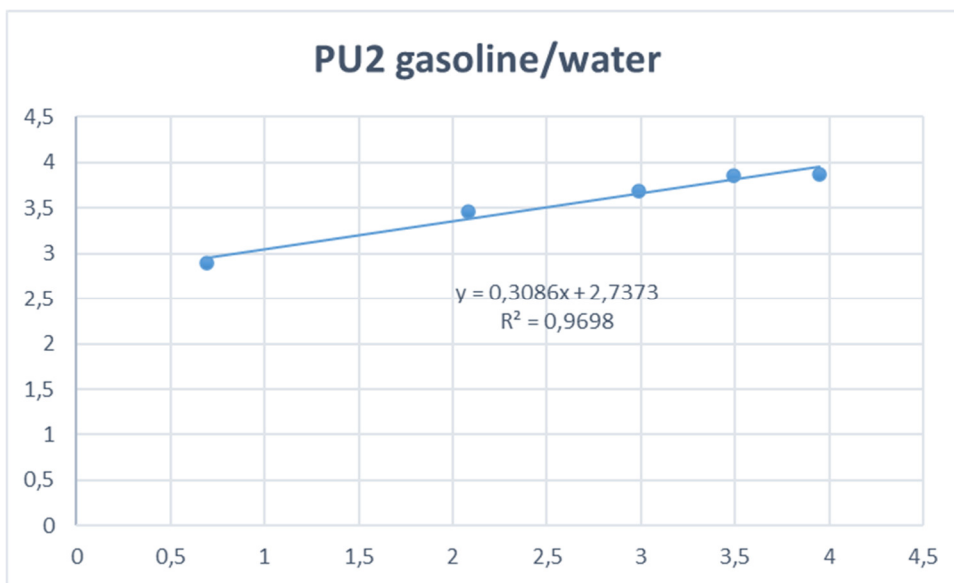

**Figure S2.** Freundlich plot for PU2 in gasoline/water system.

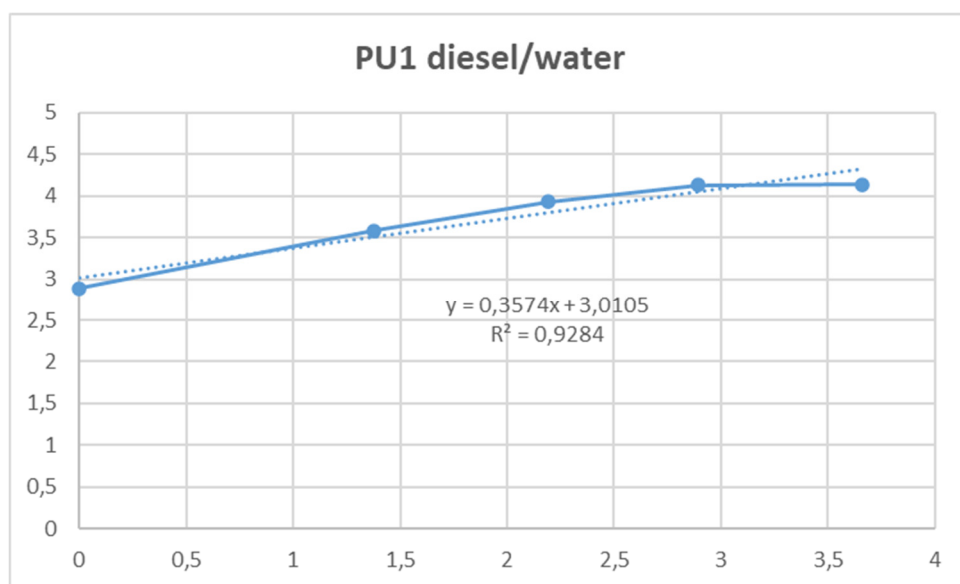

**Figure S3.** Freundlich plot for PU1 in diesel/water.

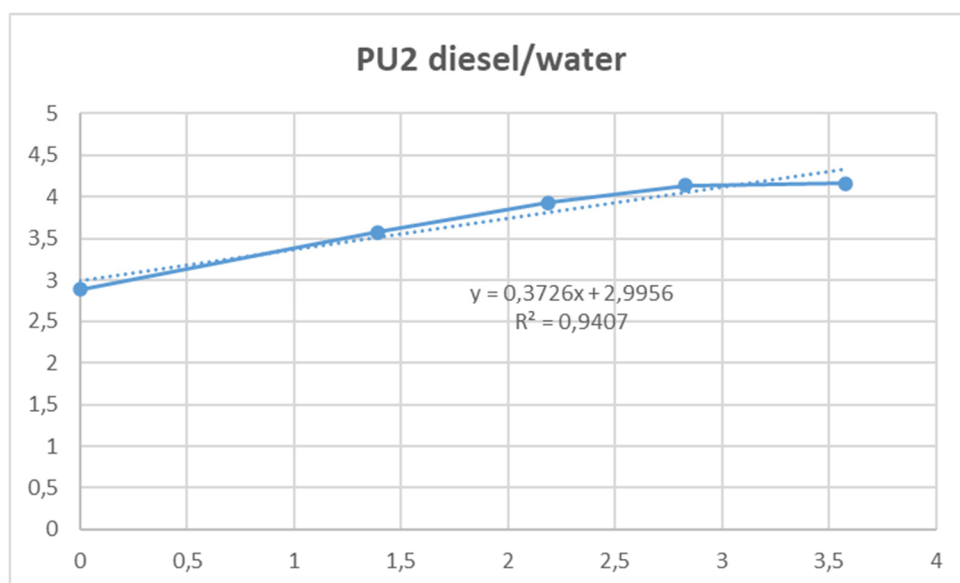

**Figure S4.** Freundlich plot for PU2 in diesel/water.

# INTRA-PARTICLE DIFFUSION MODEL PLOTS

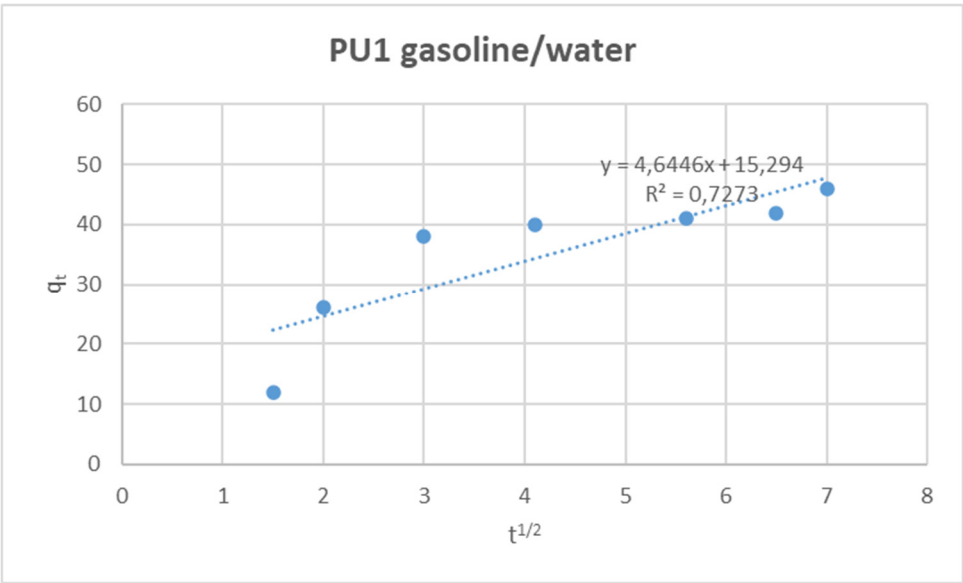

**Figure S5.** Intra-particle diffusion plot for PU1 in gasoline/water.

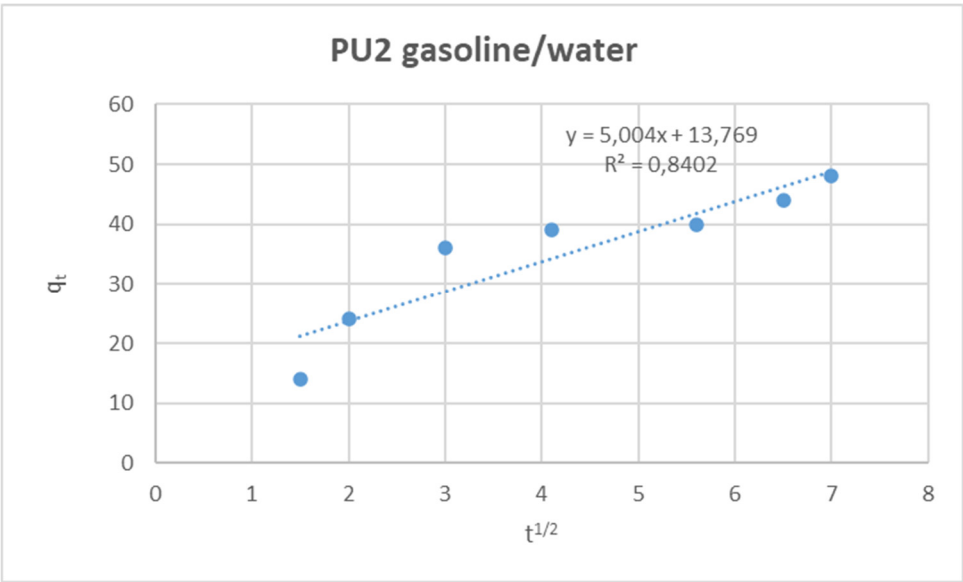

**Figure S6.** Intra-particle diffusion plot for PU2 in gasoline/water.

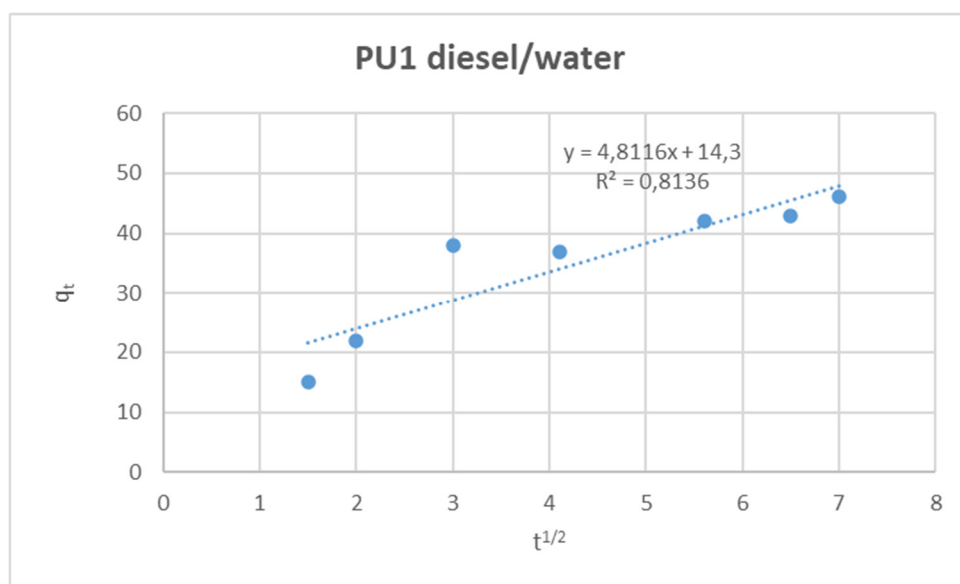

**Figure S7.** Intra-particle diffusion plot for PU1 in diesel/water.

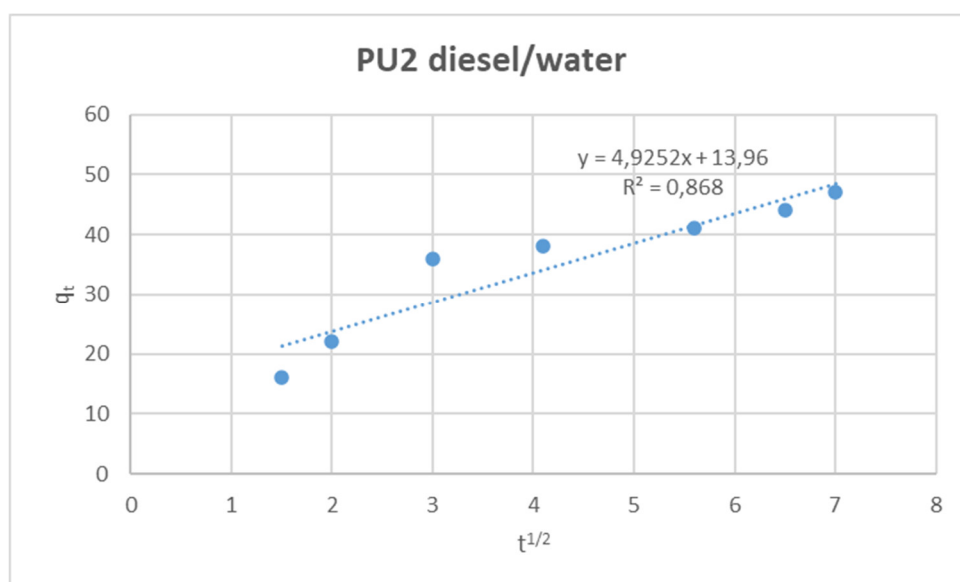

**Figure S8.** Intra-particle diffusion plot for PU2 in diesel/water.
